# Supplementary material
Source: PubMed Central journal article supplement (PMC5493736)
Supplement: rsbl20170125supp1.pdf [file rsbl20170125supp1.pdf]

1 **Electronic Supplementary Material**

2 **Physiological thermal limits predict differential responses of bees to urban heat-island**

3 **effects**

4 April L. Hamblin, Elsa Youngsteadt, Margarita M. López-Urbe, and Steven D. Frank

5 **I. Supplementary Methods**

6 Heat tolerance assay

7 Field sampling

8 Hierarchical model

9 Phylogenetic inference

10 **II. Supplementary Results**

11 Hierarchical model of species responses to warming

12 Phylogeny reconstruction

13 Trait evolution

14 Phylogenetic generalized least-squares models

15 Weighted regression

16 **III. Community Analysis**

17 **IV. References**

18

19

20

21

22

23

24 **I. Supplementary methods**

25 *Heat tolerance assay.*  $CT_{max}$  is an ecologically relevant measure of heat tolerance that  
26 represents the point when an organism can no longer escape a stressful thermal environment [1].  
27 Across ectotherms, it is also correlated with the harder-to-measure thermal optimum; in other  
28 words, species with high  $CT_{max}$  tend to have high thermal optima, such that  $CT_{max}$  should predict  
29 fitness changes even in response to sublethal temperatures [2].

30 To measure  $CT_{max}$ , we collected bees from university property and residential yards  
31 within 3.2 km of our laboratory, such that transit time from field to lab was no more than 10 min.  
32 Collecting sites were distinct from those used in the field population survey. We spent 15 – 35  
33 min netting bees, which we transported individually in 50 ml plastic tubes in an insulated  
34 container. In the lab, we transferred bees to weighted 45 ml glass vials in a circulating water bath  
35 constructed from a 13.25 L tub equipped with a recirculation pump (Rio Plus 50 Aqua Pump,  
36 TAAM, Inc., Camarillo, CA, USA) and a heating element (120V, Camco, Greensboro, NC,  
37 USA) controlled by a JLD612 dual display PID temperature controller and PT100 temperature  
38 sensor probe (Lightobject, Sacramento, CA, USA). Vial openings, plugged with cotton,  
39 remained above water. Following an initial period of 20 min at 25 °C, the bath warmed at a rate  
40 of 0.5 °C min<sup>-1</sup>. The bath accommodated seven bees at a time, and we kept an additional one to  
41 seven bees per assay in a separate, unheated bath to ensure that experimental conditions other  
42 than heat were not lethal. To monitor temperatures experienced by bees, an iButton (DS1923,  
43 Maxim Integrated, San Jose, CA, USA) recorded temperature and humidity every minute  
44 throughout the assay within identical glass vials in the heated and control baths. We recorded the  
45 time at which each bee fell over and was unable to right itself within 30s.  $CT_{max}$  for each  
46 individual bee was the iButton temperature recorded during the minute that the individual lost

47 postural control. Because not all bees could be identified prior to the  $CT_{\max}$  assay, species  
48 composition varied across trials; we present data for the 15 species that were common enough to  
49 yield at least 3 measurements per species.

50 ***Field sampling.*** Site selection and sampling are described in detail elsewhere (Hamblin  
51 et al. in review). Briefly, we used Landsat-derived thermal map of Raleigh [3] to identify 15  
52 residential yards and 3 urban natural areas that varied in warming intensity. Yards were 405 to  
53 7487 m<sup>2</sup>; natural areas were larger, but we limited sampling to 4047 m<sup>2</sup> per site. Residential  
54 neighborhoods were developed between the 1930s and 2003, such that local heat-island patterns  
55 were established at least a decade prior to sampling. All sites were more than 2 km apart to  
56 ensure independence of bee samples [4]. In 2015 we measured air temperature at each site using  
57 a pair of thermochron iButtons (DS1921, Maxim Integrated). Despite shielding iButtons as  
58 described by Hubbart [5], daytime readings were compromised by solar radiation. We therefore  
59 used only early evening temperatures (7-9pm) to compute a mean summer evening temperature  
60 at each site. Although this temperature does not represent conditions experienced by foraging  
61 bees, it captures the urban heat island effect without interference from solar radiation, accurately  
62 arraying sites on an axis from cooler to warmer [6].

63 We sampled bees from May to August, visiting each site 6 times in 2014 and 5 times in  
64 2015. At each site on each date we deployed 12 pan traps and 1 blue vane trap (SpringStar,  
65 Seattle, WA), and conducted 20 min of netting. Pan traps were 3.25 oz soufflé cups (Solo Cup  
66 Co., Urbana, IL), left white or painted fluorescent yellow or blue (Guerra Paint & Pigment, New  
67 York, NY). On each sampling date, traps were out for 5 to 7 hours between 8:00 and 17:30 and  
68 we netted between 10:00 and 17:00. The full bee sample, described elsewhere, included 113  
69 species, most of which were rare; here we focus on the 15 common species for which we also

70 measured  $CT_{max}$ . For these 15 species, the total number of individuals collected was 1732 ( $n = 11$   
71  $- 549$  per species). In all downstream analyses, the abundance of a given species at a given site  
72 refers to the total number of individuals of that species collected over the two years of sampling.

73 ***Hierarchical model.*** To estimate the rate of change in abundance of each species relative  
74 to temperature, we constructed a hierarchical model analogous to a Poisson regression with log  
75 link function:  $\log(\mu_{ij}) = a_i + r_i * t_j$  where  $\mu_{ij}$  is the predicted count (a Poisson mean) for the  $i$ th  
76 species at the  $j$ th site;  $a_i$  is the intercept for species  $i$ ,  $r_i$  is the Poisson regression coefficient for  
77 species  $i$ , and  $t_j$  is the temperature at site  $j$ . The coefficient  $r_i$  represents proportional change in  
78 abundance of a species per  $^{\circ}C$  increase in temperature, and we refer to it as “response to  
79 warming” throughout this study. (Specifically, for each  $1^{\circ}C$  increase in temperature,  $\mu$  is  
80 multiplied by  $e^{r_i}$ .) We further specified  $r_i$  as arising from a normal distribution with mean  $\beta$  and  
81 variance  $\sigma^2$ , so that responses of all species were estimated jointly relative to the overall, species-  
82 wide response,  $\beta$ . This approach allowed information from the entire dataset to inform the  
83 estimates for each species, stabilizing estimates for rarer taxa [7,8]. We fit the model in  
84 WinBUGS 1.4, assuming uninformative prior distributions for  $a$ ,  $\beta$ , and  $\sigma^2$ . We used 3 Markov  
85 chain simulations, each independently initialized and computed for 21000 draws. After  
86 inspecting diagnostic plots for convergence and autocorrelation, we discarded the first 1000  
87 draws from each chain and thinned to every tenth draw for a final sample of 6000 draws, which  
88 we used to compute estimates, standard errors, and 95% credible intervals for each species’  
89 response to warming ( $r_i$ ).

90 ***Phylogenetic inference.*** We downloaded the 20 gene dataset generated by Hedtke et al.  
91 [9], and selected one outgroup (*Dasypoda hirtipes*) and the lineages of interest for our study.  
92 Eleven of the 20 genes contained less than 10% of sequence data for our ingroup, thus we

93 removed those genes from our dataset. We included the following nine genes in our study:  
94 arginine kinase (AK), calcium/calmodulin-dependent protein kinase II (CAD), elongation factor  
95 1- $\alpha$  copy 1 and 2 (EF1a1, EF1a2), sodium potassium adenosine triphosphate (NAD),  
96 phosphoenolpyruvate carboxykinase (PEPCK), long wavelength rhodopsin (Opsin), RNA  
97 polymerase II (PolII), and wingless (Wg). We added sequence data from the mitochondrial gene  
98 cytochrome oxidase I (COI) to improve species level resolution within the genera *Bombus* and  
99 *Megachile*. COI sequences for all species were retrieved from the National Center for  
100 Biotechnology Information (NCBI) or the BOLD System (table S1). We used sequences from  
101 the phylogenetically closest species when sequences from the focal species were not available.  
102 We aligned COI nucleotide sequences using the MUSCLE option in SeaView v.4.5.3 [10] and  
103 concatenated to nine-gene dataset [9]. Phylogenetic reconstruction was based on a total of 10,252  
104 nucleotides in our final alignment. Alignments were visually inspected and improved in  
105 Mesquite 3.0.3. Maximum likelihood trees were searched under the GTRGAMMA model of  
106 sequence evolution in RAxML using 1000 bootstrap replicates after partition optimization using  
107 the python script PartitionFinder v1.1.1 [11]. Trees were visually inspected and annotated in  
108 FigTree v.1.4.2 (<http://tree.bio.ed.ac.uk/>).

109

110

111

112

113

114

115

116 Table S1. COI sequences and genbank accession numbers. These sequences were concatenated  
 117 to 9 genes from Hedtke et al. [9].

| Species in this study         | Species in Hedtke et al.      | Species for COI               | COI Genbank Accession No. |
|-------------------------------|-------------------------------|-------------------------------|---------------------------|
| <i>Agapostemon virescens</i>  | <i>Agapostemon kohliellus</i> | <i>Agapostemon virescens</i>  | JQ266376                  |
| <i>Bombus bimaculatus</i>     | <i>Bombus bimaculatus</i>     | <i>Bombus bimaculatus</i>     | KM585629                  |
| <i>Bombus griseocollis</i>    | <i>Bombus griseocollis</i>    | <i>Bombus griseocollis</i>    | SMTPL8163*                |
| <i>Bombus impatiens</i>       | <i>Bombus wilmattae</i>       | <i>Bombus impatiens</i>       | JF799030                  |
| <i>Ceratina calcarata</i>     | <i>Ceratina calcarata</i>     | <i>Ceratina calcarata</i>     | KJ166268                  |
| <i>Ceratina strenua</i>       | <i>Ceratina cyanea</i>        | <i>Ceratina strenua</i>       | KJ163420                  |
| <i>Halictus ligatus</i>       | <i>Halictus ligatus</i>       | <i>Halictus ligatus</i>       | AF102840                  |
| <i>Lasioglossum bruneri</i>   | <i>Lasioglossum cressonii</i> | <i>Lasioglossum bruneri</i>   | JF903499                  |
| <i>Lasioglossum imitatum</i>  | <i>Lasioglossum imitatum</i>  | <i>Lasioglossum imitatum</i>  | AF103967                  |
| <i>Megachile campanulae</i>   | <i>Megachile angelarum</i>    | <i>Megachile cetuncularis</i> | FJ582307                  |
| <i>Megachile exilis</i>       | <i>Megachile angelarum</i>    | <i>Megachile versicolor</i>   | KJ836926                  |
| <i>Megachile mendica</i>      | <i>Megachile patellimana</i>  | <i>Megachile mendica</i>      | KF839683                  |
| <i>Megachile rotundata</i>    | <i>Megachile texana</i>       | <i>Megachile rotundata</i>    | GU706002                  |
| <i>Ptilothrix bombiformis</i> | <i>Ptilothrix sp. JS 2010</i> | <i>Ptilothrix bombiformis</i> | AF300562                  |
| <i>Xylocopa virginica</i>     | <i>Xylocopa virginica</i>     | <i>Xylocopa virginica</i>     | EU271670                  |

118 \* Retrieved from BOLD system

119

120

121 **II. Supplementary results**

122 **Hierarchical model of species responses to warming.** The assemblage-wide mean response to  
123 warming was significantly negative with  $\beta = -0.66$  (95% CI -0.96 to -0.40). Within this overall  
124 trend, species varied in their rates of decline; four species' responses were indistinguishable from  
125 zero (as indicated by 95% credible intervals, fig. S1).

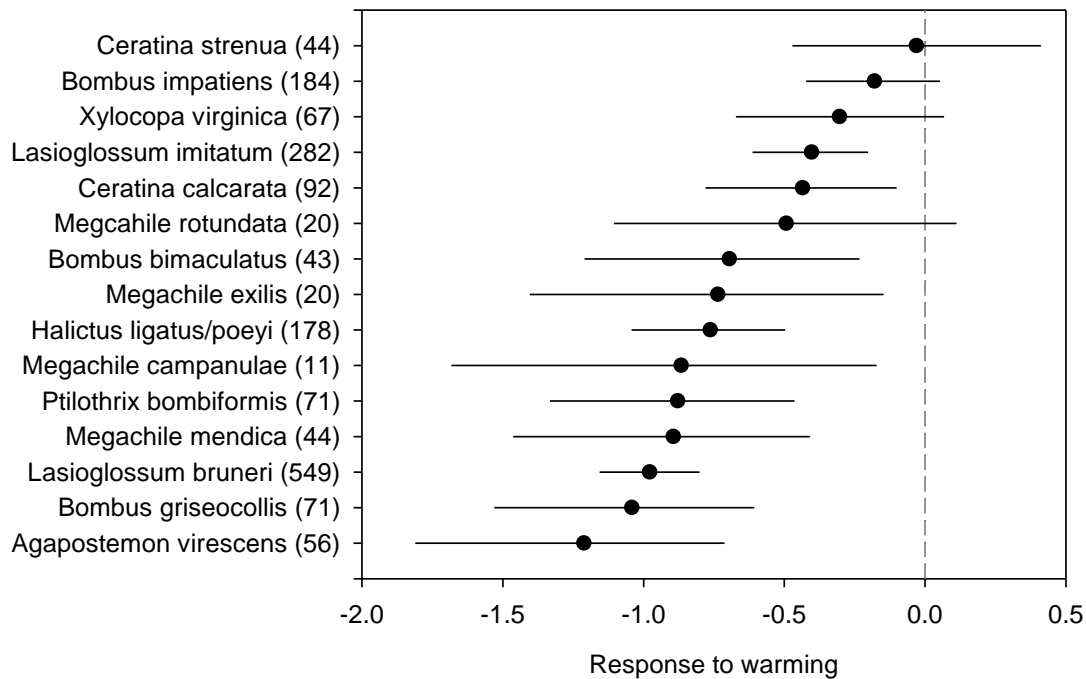

126  
127 Figure S1. Results of hierarchical model estimating Poisson regression coefficients for each bee  
128 species (“response to warming” as rate of population change per °C). Error bars are 95% credible  
129 intervals; numbers in parentheses are total number of individuals collected.

130  
131 **Phylogeny reconstruction.** We reconstructed the phylogenetic relationships of 21 bee  
132 species from four families using information from one mitochondrial and nine nuclear genes (fig.  
133 S2). The maximum likelihood phylogenetic reconstruction recovered all bee families with high  
134 bootstrap support, and the tree topology is congruent with Hedtke et al.

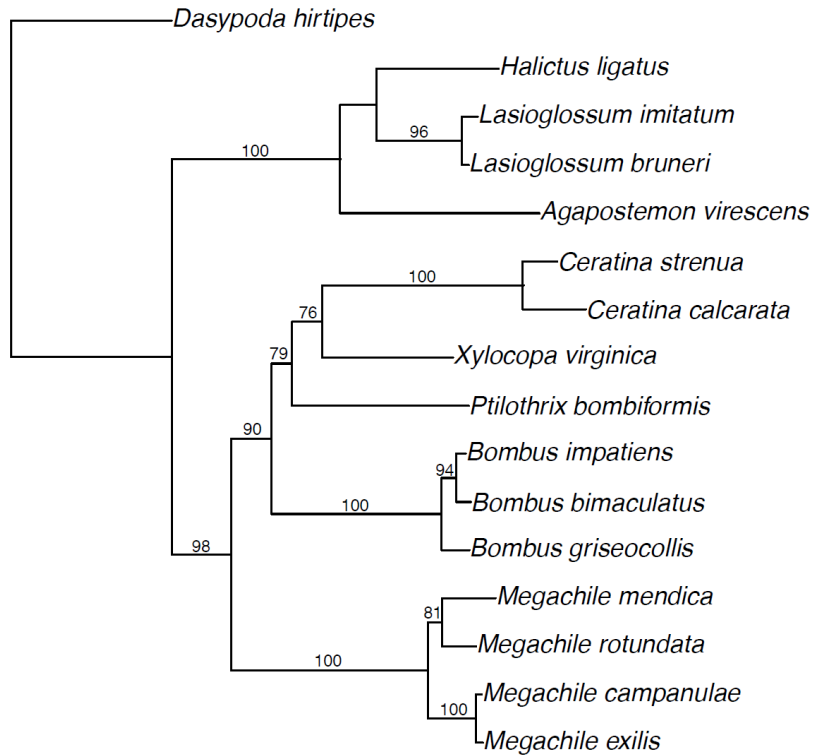

135

136

137 Figure S2. Phylogenetic reconstruction of 15 focal bee species; numbers on branches are  
 138 bootstrap values after 10000 replicates.

139

140 **Trait evolution.** The relationship between phylogeny,  $CT_{max}$ , nesting behavior, and  
 141 sociality is shown in fig. S3. We did not detect strong phylogenetic signal in  $CT_{max}$ ; that is,  
 142 models of trait evolution that incorporated the phylogeny were not a better fit to the data than  
 143 was a phylogenetically independent white-noise model ( $\Delta AICc < 2$ , table S2). Body size, nesting  
 144 habitat, and social behavior were all phylogenetically correlated; Brownian motion and Early  
 145 Burst were the best-supported models of trait evolution (tables S2-S3).



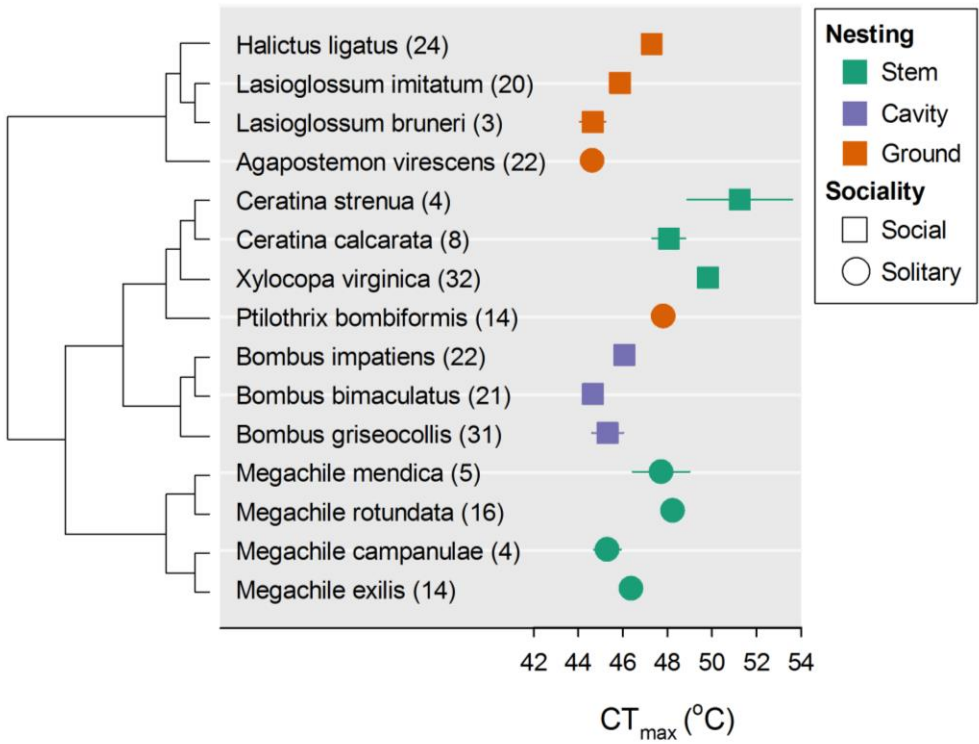

146

147 Figure S3. Bee traits considered in this study, as they relate to the phylogeny (numbers in  
 148 parentheses are sample sizes for  $CT_{max}$  assay).

149

150 Table S2. Models describing trait evolution of  $CT_{max}$  and body size across the bee phylogeny.

151 Best-fitting models ( $\Delta AICc < 2$ ) for each trait are bolded.

| Model              | $CT_{max}$   |               |                                                     | Body size    |               |                                     |
|--------------------|--------------|---------------|-----------------------------------------------------|--------------|---------------|-------------------------------------|
|                    | AICc         | $\Delta AICc$ | Parameters                                          | AICc         | $\Delta AICc$ | Parameters                          |
| Brownian motion    | <b>67.37</b> | <b>0.99</b>   | <b><math>\sigma^2 = 23.59</math></b>                | <b>50.29</b> | <b>0.00</b>   | <b><math>\sigma^2 = 7.56</math></b> |
| Ornstein-Uhlenbeck | <b>66.38</b> | <b>0.00</b>   | <b><math>\sigma^2 = 46.48, \alpha = 5.76</math></b> | 53.36        | 3.07          | $\sigma^2 = 8.93, \alpha = 0.82$    |
| White noise        | <b>66.95</b> | <b>0.57</b>   | <b><math>\sigma^2 = 3.64, \mu = 46.87</math></b>    | 60.59        | 10.30         | $\sigma^2 = 2.38, \mu = 2.70,$      |
| Pagel's $\lambda$  | <b>66.66</b> | <b>0.28</b>   | <b><math>\sigma^2 = 9.69, \lambda = 0.78</math></b> | 53.47        | 3.18          | $\sigma^2 = 7.56, \lambda = 1.00$   |
| Early burst        | 70.55        | 4.17          | $\sigma^2 = 23.59, a = 1.00 \times 10^{-6}$         | 53.28        | 2.99          | $\sigma^2 = 15.03, a = -2.01$       |

152

153

154

155 Table S3. Models describing trait evolution of discrete traits, nesting habitat and sociality, across the bee phylogeny. Best-fitting  
 156 models ( $\Delta\text{AICc} < 2$ ) for each trait are bolded.

| Model             | Nesting      |                     |                   |                   | Sociality    |                     |                   |                   |  |
|-------------------|--------------|---------------------|-------------------|-------------------|--------------|---------------------|-------------------|-------------------|--|
|                   | AICc         | $\Delta\text{AICc}$ | Parameters        | Rate <sup>1</sup> | AICc         | $\Delta\text{AICc}$ | Parameters        | Rate <sup>2</sup> |  |
| Equal-rate models |              |                     |                   |                   |              |                     |                   |                   |  |
| Brownian motion   | 19.98        | 2.42                | NA                | 0.68              | <b>15.21</b> | <b>0.00</b>         | NA                | <b>1.48</b>       |  |
| White noise       | 36.31        | 18.80               | NA                | NA                | 22.50        | 7.29                | NA                | NA                |  |
| Pagel's $\lambda$ | 22.67        | 5.11                | $\lambda = 1.00$  | 0.68              | 17.90        | 2.69                | $\lambda = 1.00$  | 1.48              |  |
| Early burst       | <b>17.56</b> | <b>0.00</b>         | <b>a = -28.06</b> | <b>978.17</b>     | <b>15.84</b> | <b>0.63</b>         | <b>a = -20.15</b> | <b>978.17</b>     |  |

157

158

159

160

161

162 **Phylogenetic generalized least-squares models.** Regardless of the pattern of evolution of  
 163 individual traits, the residuals of models relating those traits to one another (as in our two focal  
 164 hypotheses) can also show phylogenetic signal. We addressed this possibility by comparing  
 165 several models that differed only in their phylogenetic covariance structure. In the main text, we  
 166 present the results of the best-fitting models; in Table S4 we provide fit details for the alternative  
 167 models.

168  
 169 Table S4. Comparison of generalized least-squares models testing two hypotheses with different  
 170 phylogenetic correlation structures.

| Model                                            | Phylogenetic correlation structure | d.f. | Log likelihood    | AICc | $\Delta AIC_c$ | Model weight |
|--------------------------------------------------|------------------------------------|------|-------------------|------|----------------|--------------|
| CT <sub>max</sub> ~ Body size + Nest + Sociality | Pagel's $\lambda$                  | 7    | -0.3              | 30.6 | 0.0            | 1.0          |
|                                                  | None                               | 6    | -25.1             | 72.6 | 42.0           | 0.0          |
|                                                  | Ornstein-Uhlenbeck                 | 7    | -24.5             | 79.0 | 48.4           | 0.0          |
|                                                  | Brownian motion                    | 6    | -30.1             | 82.7 | 52.1           | 0.0          |
| Response to warming ~ CT <sub>max</sub>          | None                               | 3    | -0.3              | 8.7  | 0.0            | 0.8          |
|                                                  | Ornstein-Uhlenbeck                 | 4    | 0.05              | 11.9 | 3.2            | 0.2          |
|                                                  | Brownian motion                    | 3    | -6.6              | 21.3 | 12.62          | 0.0          |
|                                                  | Pagel's $\lambda$                  |      | did not converge* |      |                |              |

171  
 172 \*Although the Pagel's  $\lambda$  model did not converge using the gls function in nlme package in R, and  
 173 therefore is not included for direct comparison with the other gls models, we examined a  
 174 comparable model with Pagel correlation structure using the pgl function in the caper package,  
 175 which produced a maximum-likelihood estimate of  $\lambda = 0$  (95% CI 0 to 0.594). We also manually  
 176 fit different values of  $\lambda$  in the gls function, and likelihood was maximized at  $\lambda = 0$ . These checks  
 177 support the conclusion that there is not strong phylogenetic signal in the relation between  
 178 response to warming and CT<sub>max</sub>.

179 **Weighted regression.** To examine the possibility that error in the estimation of species  
180 responses to warming influenced our analysis of the relationship between  $CT_{max}$  and response to  
181 warming, we further examined the non-phylogenetic model using weighted regression. We  
182 weighted each response to warming by the inverse of its standard error (as estimated in the  
183 hierarchical model), thereby reducing the influence of the least certain estimates. We fit the  
184 weighted regression using the `lm` function in the `stats` package of R. Results (table S5) were  
185 comparable to those of the non-weighted regression shown in the main text.

186

187 Table S5. Results of weighted regression describing each species' response to warming as a  
188 function of its  $CT_{max}$  (where each response is weighted by the inverse of its standard error).

| <b>Term</b> | <b>Coefficient</b> | <b>s.e.</b> | <b><i>t</i></b> | <b><i>p</i></b> |
|-------------|--------------------|-------------|-----------------|-----------------|
| Intercept   | -5.52              | 1.86        | -3.0            | <b>0.011</b>    |
| $CT_{max}$  | 0.10               | 0.040       | 2.6             | <b>0.021</b>    |

189

190

191

192

193

194

195

196

197

198

199

### 200 **III. Community Analysis**

201 The results of the hierarchical model demonstrate that some bee species declined faster than  
202 others in response to warming. These differential rates of change imply that species' relative  
203 abundances, and thus community composition, also shifted with warming. Here, we explicitly  
204 test for an effect of temperature on bee community composition across sites by performing a  
205 distance-based redundancy analysis (db-RDA) using the *vegan* package in R [12]. This  
206 constrained ordination analysis assumes a linear relation between predictors (here, temperature)  
207 and the multivariate response (bee abundances), and tests significance with a permutation test  
208 (without assuming multivariate normality) [13,14]. In this analysis, we  $\log(x+1)$  transformed bee  
209 counts to meet the assumption of linearity, and used db-RDA with Bray-Curtis distances because  
210 the Euclidean distances of standard RDA are misleading when the data include many zeros [13].

211 The db-RDA detected significant effects of site temperature on community composition  
212 across sites, with 14% of the inertia in the dataset represented on the db-RDA axis that aligns  
213 with temperature ( $p = 0.015$ , fig. S4). Species' loadings on the temperature axis could be  
214 analyzed as an alternate quantification of "response to warming" that makes the connection  
215 between  $CT_{\max}$  and community ordination more explicit. For ease of interpretation, however, we  
216 focused our analyses on the Poisson regression coefficients, for which error is more readily  
217 estimated and which represent rate of change in biologically meaningful units.

218

219

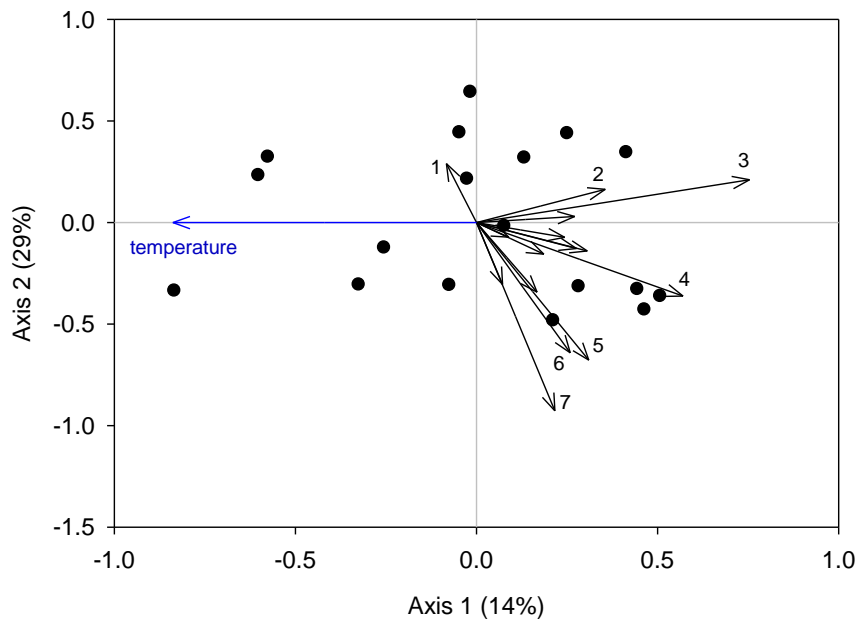

220

221 Figure S4. db-RDA ordination indicates that bee community composition varied across sites as a  
 222 function of temperature. Black points represent the positions of the 18 study sites in ordination  
 223 space, as they relate to temperature (blue arrow) and bee species abundances (black arrows).

224 Arrows indicate the direction of increase of each variable; the plot was generated using scaling =  
 225 3 to optimize display of sites and species. For clarity, only selected species are labeled. They are  
 226 1, *Ceratina strenua*; 2, *Ceratina calcarata*; 3, *Lasioglossum bruneri*; 4, *Bombus griseocollis*; 5,  
 227 *Agapostemon virescens*; 6, *Megachile mendica*; 7, *Halictus ligatus/poeyi*.

228

229

230

231

232

233

234

235 **References Cited in the Supplementary Material**

- 236 1. Lighton, J.R. & Turner, R.J. 2004 Thermolimit respirometry: an objective assessment of  
237 critical thermal maxima in two sympatric desert harvester ants, *Pogonomyrmex rugosus* and *P.*  
238 *californicus*. *J. Exp. Biol.* **207**, 1903-1913.
- 239 2. Huey, R.B. & Kingsolver, J.G. 1993 Evolution of resistance to high temperature in  
240 ectotherms. *Am. Nat.*, S21-S46.
- 241 3. Meineke, E.K., Dunn, R.R., Sexton, J.O. & Frank, S.D. 2013 Urban warming drives insect  
242 pest abundance on street trees. *PLoS ONE* **8**, e59687.
- 243 4. Greenleaf, S.S., Williams, N.M., Winfree, R. & Kremen, C. 2007 Bee foraging ranges and  
244 their relationship to body size. *Oecologia* **153**, 589-596.
- 245 5. Hubbart, J.A. 2011 An inexpensive alternative solar radiation shield for ambient air  
246 temperature and relative humidity micro-sensors. *Journal of Natural and Environmental*  
247 *Sciences* **2**, 9-14.
- 248 6. Meineke, E., Youngsteadt, E., Dunn, R.R. & Frank, S.D. 2016 Urban warming reduces  
249 aboveground carbon storage. *Proc. R. Soc. B* **283**, 20161574.
- 250 7. Gotelli, N.J., Dorazio, R.M., Ellison, A.M. & Grossman, G.D. 2010 Detecting temporal trends  
251 in species assemblages with bootstrapping procedures and hierarchical models. *Philos. Trans. R.*  
252 *Soc. B* **365**, 3621-3631.
- 253 8. Kruschke, J.K. 2015 *Doing Bayesian Data Analysis: A Tutorial with R, JAGS, and STAN*.  
254 London, Academic Press.
- 255 9. Hedtke, S.M., Patiny, S. & Danforth, B.N. 2013 The bee tree of life: a supermatrix approach  
256 to apoid phylogeny and biogeography. *BMC Evol. Biol.* **13**, 138.

- 257 10. Gouy, M., Guindon, S. & Gascuel, O. 2010 SeaView version 4: A multiplatform graphical  
258 user interface for sequence alignment and phylogenetic tree building. *Mol. Biol. Evol.* **27**, 221–  
259 224.
- 260 11. Lanfear, R., Calcott, B., Ho, S.Y. & Guindon, S. 2012 PartitionFinder: combined selection of  
261 partitioning schemes and substitution models for phylogenetic analyses. *Mol. Biol. Evol.* **29**,  
262 1695-1701.
- 263 12. Oksanen, J., Blanchet, F.G., Friendly, M., Kindt, R., Legendre, P., McGlenn, D., Minchin,  
264 P.R., O'Hara, R.B., Simpson, G.L., Solymos, P., et al. 2016 Vegan: community ecology package.  
265 R package version 2.4-1. Available at: [CRAN.R-project.org/package=vegan](http://CRAN.R-project.org/package=vegan).
- 266 13. Legendre, P. & Legendre, L. 2012 *Numerical Ecology*. Amsterdam, Elsevier.
- 267 14. Gotelli, N.J. & Ellison, A.M. 2004 *A Primer of Ecological Statistics*. Sunderland,  
268 Massachusetts, USA, Sinauer.

269

270
